# Supplementary material
Source: PubMed Central journal article supplement (PMC3497680)
Supplement: JVI.01785-12_zjv999096910so1.pdf [file JVI.01785-12_zjv999096910so1.pdf]

**Table S1 Primers used in the research**

| Primer Name     | Sequence                                                             |
|-----------------|----------------------------------------------------------------------|
| NS4B-FLAG-F     | 5' TTTAAGCTTGCCACCATGGCCTCTAGGGCGGCTCTCATCG 3'                       |
| NS4B-FLAG-R     | 5' AAAGAATTCCTACTTATCATCATCATCCTTGTAATCGCATGG<br>GATGGGGCAGTCCTCA 3' |
| PLA2G4C-HA-F    | 5' TTTTGAATTCGCCACCATGGGAAGCTCTGAAGTTTCCATAAT 3'                     |
| PLA2G4C-HA-R    | 5' AAAGATATCCTAAGCGTAATCTGGAACATCGTATGGGTATG<br>CCAAGCAGCAACTTCGG 3' |
| NS4B-EGFP-F     | 5' TTTTAGATCTGCCACCATGGCCTCTAGGGCGGCTCTCATCG 3'                      |
| NS4B-EGFP-R     | 5' AAAAGAATTCGGCATGGGATGGGGCAGTCCTCA 3'                              |
| Core-F          | 5' TTTTGAATTCATGAGCACAAATCCTAAACCTCAAAG 3'                           |
| E1-F            | 5' TTTTGAATTCATGGCCCAGGTGAAGAATACCAGTAGCAGC 3'                       |
| NS2-F           | 5' TTTTGAATTCATGTATGACGCACCTGTGCACGGACAG 3'                          |
| NS3-F           | 5' TTTTGAATTCATGGCTCCCATCACTGCTTATGCCCAGC 3'                         |
| Core-R          | 5' AAAATCTAGATTAAGCAGAGACCGGAACGGTGATGC 3'                           |
| p7-R            | 5' AAAATCTAGATTAGGCATAAGCCTGCCGGGGCA 3'                              |
| NS2-R           | 5' AAAATCTAGATTAAGGAGCTTCCACCCCTTGGAGGT 3'                           |
| NS5B-R          | 5' AAAATCTAGATTACCGAGCGGGGAGTAGGAAGAGGC 3'                           |
| Renilla-F       | 5' CCCCGAATTCATGACTTCGAAAGTTTATGATCC 3'                              |
| Renilla-R       | 5' CCCCgATATCTTATTGTTcATTTTTGAGAACTC 3'                              |
| IRES-F          | 5' CCCCgATATCCCTGTGAGGAActACTGTCTTC 3'                               |
| IRES-R          | 5' CCCCgCGGCCGCCTTAACGTCTTCTGGGCGAC 3'                               |
| Firefly-F       | 5' CCCGCGGCCGCGATGGAAGACGCCAAAAACATA 3'                              |
| Firefly-R       | 5' CCCCTCGAGTTACACGGCGATCTTTCCG 3'                                   |
| HCV/F           | 5' ATCACTCCCCTGTGAGGAACT 3'                                          |
| HCV/R           | 5' GCGGGTTGATCCAAGAAAGG 3'                                           |
| beta-actin/F    | 5' TGGAATCCTGTGGCATCCATGAAAC 3'                                      |
| beta-actin/R    | 5' TAAAACGCAGCTCAGTAACAGTCCG 3'                                      |
| PLA2G4C/F       | 5' CCTTGAGTTCACCTTGGCTGTCCTAA 3'                                     |
| PLA2G4C/R       | 5' AAGGAGCAGTGAAGGCATTGGTC 3'                                        |
| PLA2G4C(S82A)-F | 5' TCACGTACCTCGCAGGGGTCGCTGGATCCACTTGGGCAATATC 3'                    |
| PLA2G4C(S82A)-R | 5' GATATTGCCCAAGTGGATCCAGCGACCCCTGCGAGGTACGTGA 3'                    |
